# Supplementary material for: Physiological and Transcriptomic Responses of Bok Choy to Heat Stress
Source: MDPI journal article supplement (doi:10.3390/plants13081093), 2024-04-13
Supplement: s1 [file s1]

**Table S1.** The index of heat damage of different genotypes of baby bok choy at the seeding stage under heat stress.

| Material Code | Heat Damage | Variety Name      | Material Code | Heat Damage | Variety Name          |
|---------------|-------------|-------------------|---------------|-------------|-----------------------|
| C1            | 0.36        | Aiguanjun         | C14           | 0.38        | Yuanzhongshanghaiqing |
| C2            | 0.31        | Jimaocai          | C15           | 0.55        | Shanghaikangre105     |
| C3            | 0.18        | Xiabin            | C16           | 0.56        | Sanyueman             |
| C4            | 0.27        | Aijiaohuang       | C17           | 0.35        | Pinweiyixia           |
| C5            | 0.23        | Jinpin            | C18           | 0.39        | Zhongxia              |
| C6            | 0.18        | Degaoxiang        | C19           | 0.39        | Yulonghuaxiu          |
| C7            | 0.16        | Jinmei1           | C20           | 0.3         | Huawangqinggengcai    |
| C8            | 0.55        | Qibaoqingcai      | C21           | 0.44        | Degaoqingxia          |
| C9            | 0.35        | Zhonggengbai      | C22           | 0.37        | Dianmei               |
| C10           | 0.32        | Liqunqinggeng     | C23           | 0.31        | Xiasuqing             |
| C11           | 0.33        | Gaogengbai        | C24           | 0.39        | Zajiaoshanghaiqing    |
| C12           | 0.3         | Huayouqinggengbai | C25           | 0.52        | Siyueman              |
| C13           | 0.31        | Xiadi             | C26           | 0.54        | Wuyueman              |

**Table S2.** Agronomic traits of 26 varieties at high temperatures.

| Material Code | Leaf Area Ratio (%) | Plant Height (cm)     | Leaf Color ( $\Delta E$ ) |
|---------------|---------------------|-----------------------|---------------------------|
| C1            | 82.77 $\pm$ 0.01 de | 6.53 $\pm$ 1.24 efg   | 3.22 $\pm$ 0.08 ab        |
| C3            | 91.75 $\pm$ 0.03 ab | 4.30 $\pm$ 0.16 g     | 2.09 $\pm$ 0.15 e         |
| C4            | 91.63 $\pm$ 0.03 b  | 5.07 $\pm$ 0.97 g     | 4.32 $\pm$ 0.08 ab        |
| C5            | 92.29 $\pm$ 0.01 ab | 4.97 $\pm$ 0.12 g     | 2.32 $\pm$ 0.47 j         |
| C6            | 94.38 $\pm$ 0.01 a  | 4.17 $\pm$ 0.12 g     | 2.73 $\pm$ 0.08 fgh       |
| C7            | 95.10 $\pm$ 0.02 a  | 5.57 $\pm$ 0.25 g     | 2.15 $\pm$ 0.06 fghi      |
| C8            | 82.75 $\pm$ 0.02 de | 9.07 $\pm$ 1.76 abcde | 7.61 $\pm$ 0.46 b         |
| C9            | 86.90 $\pm$ 0.03 c  | 6.87 $\pm$ 2.41 cdefg | 3.30 $\pm$ 0.03 c         |
| C10           | 85.24 $\pm$ 0.01 cd | 6.23 $\pm$ 0.59 fg    | 5.90 $\pm$ 0.47 cd        |
| C11           | 85.98 $\pm$ 0.02 cd | 6.23 $\pm$ 1.56 fg    | 3.37 $\pm$ 0.41 ab        |
| C12           | 83.93 $\pm$ 0.01 cd | 6.70 $\pm$ 0.65 defg  | 3.14 $\pm$ 0.04 j         |
| C13           | 82.91 $\pm$ 0.02 de | 6.53 $\pm$ 0.88 efg   | 5.96 $\pm$ 0.06 d         |
| C14           | 85.68 $\pm$ 0.02 cd | 6.53 $\pm$ 0.17 efg   | 3.36 $\pm$ 0.07 fgh       |
| C15           | 76.72 $\pm$ 0.00 g  | 6.90 $\pm$ 1.04 cdefg | 7.48 $\pm$ 0.32 fgh       |
| C16           | 70.23 $\pm$ 0.02 h  | 10.90 $\pm$ 2.33 ab   | 8.10 $\pm$ 0.40 b         |
| C17           | 86.46 $\pm$ 0.03 c  | 5.30 $\pm$ 0.88 g     | 2.59 $\pm$ 0.05 j         |
| C18           | 85.25 $\pm$ 0.02 cd | 4.87 $\pm$ 0.76 g     | 2.99 $\pm$ 0.08 hij       |
| C19           | 83.13 $\pm$ 0.02 de | 9.40 $\pm$ 1.36 abcd  | 5.14 $\pm$ 0.07 ij        |
| C20           | 84.11 $\pm$ 0.02 cd | 11.03 $\pm$ 0.96 ab   | 5.19 $\pm$ 0.05 ghi       |
| C21           | 79.54 $\pm$ 0.03 e  | 4.27 $\pm$ 0.33 g     | 5.54 $\pm$ 0.66 cd        |
| C22           | 83.24 $\pm$ 0.02 de | 6.83 $\pm$ 1.11 cdefg | 3.45 $\pm$ 0.16 fghi      |
| C23           | 83.88 $\pm$ 0.02 de | 8.53 $\pm$ 0.93 bcdef | 3.77 $\pm$ 0.16 fgh       |
| C24           | 91.06 $\pm$ 0.01 b  | 6.77 $\pm$ 0.86 cdefg | 3.61 $\pm$ 0.13 c         |
| C25           | 79.40 $\pm$ 0.01 f  | 10.47 $\pm$ 0.17 ab   | 7.38 $\pm$ 0.08 ef        |
| C26           | 78.85 $\pm$ 0.02 g  | 11.37 $\pm$ 0.12 a    | 7.17 $\pm$ 0.06 fg        |

a–j stands for significant difference.

**Table S3.** Physiological and biochemical indexes of 26 varieties.

| Material Code | Soluble Protein (mg.g <sup>-1</sup> ) | Soluble Sugar (mg.g <sup>-1</sup> ) | Vc (%)  | MDA (nmol. g <sup>-1</sup> ) | Relative Conductivity (%) | Cellulose (%) |
|---------------|---------------------------------------|-------------------------------------|---------|------------------------------|---------------------------|---------------|
| C1            | 19.75 ±                               | 11.21 ±                             | 80.18 ± | 6.68 ±                       | 18.67 ±                   | 16.94 ± 1.11  |
|               | 0.11 de                               | 0.08 f                              | 0.67 de | 0.05 d                       | 0.01 cd                   | cde           |
| C2            | 19.83 ±                               | 11.73 ±                             | 80.20 ± | 6.71 ±                       | 17.48 ±                   | 17.07 ± 0.48  |
|               | 0.36 de                               | 0.14 ef                             | 0.06 de | 0.25 d                       | 0.01 cde                  | cde           |
| C3            | 25.00 ±                               | 18.24 ±                             | 81.79 ± | 4.73 ±                       | 15.49 ±                   | 26.28 ± 0.98  |
|               | 0.65 b                                | 0.01 a                              | 0.44 c  | 0.41 e                       | 0.01 de                   | a             |
| C4            | 19.60 ±                               | 8.92 ± 0.10                         | 81.70 ± | 6.89 ±                       | 19.38 ±                   | 16.52 ± 0.27  |
|               | 0.26 de                               | hi                                  | 0.23 c  | 0.33 cd                      | 0.02 c                    | f             |
| C5            | 23.78 ±                               | 18.39 ±                             | 86.22 ± | 4.94 ±                       | 16.47 ±                   | 8.98 ± 0.49 f |
|               | 0.32 c                                | 0.39 a                              | 0.78 a  | 0.45 e                       | 0.02 cde                  |               |
| C6            | 25.13 ±                               | 17.38 ±                             | 83.62 ± | 4.96 ±                       | 16.09 ±                   | 9.40 ± 0.311  |
|               | 0.11 b                                | 0.07 b                              | 0.14 b  | 0.05 e                       | 0.01 cde                  | f             |
| C7            | 26.23 ±                               | 16.46 ±                             | 87.17 ± | 4.69 ±                       | 14.17 ±                   | 26.94 ± 0.52  |
|               | 0.21 a                                | 0.31 c                              | 0.20 a  | 0.15 e                       | 0.01 e                    | a             |
| C8            | 17.40 ±                               | 4.58 ± 0.06                         | 72.59 ± | 9.58 ±                       | 32.66 ±                   | 8.75 ± 0.26 f |
|               | 0.30 fg                               | j                                   | 0.20 f  | 0.63 b                       | 0.02 ab                   |               |
| C9            | 19.42 ±                               | 12.46 ±                             | 79.95 ± | 7.59 ±                       | 18.92 ±                   | 18.00 ± 0.88  |
|               | 0.34 de                               | 0.55 d                              | 0.94 e  | 0.63 b                       | 0.01 cd                   | c             |
| C10           | 19.92 ±                               | 12.36 ±                             | 69.56 ± | 6.70 ±                       | 18.13 ±                   | 16.44 ± 0.74  |
|               | 0.77 de                               | 0.10 de                             | 0.46 g  | 0.08 d                       | 0.01 cde                  | de            |
| C11           | 19.90 ±                               | 12.89 ±                             | 80.23 ± | 6.85 ±                       | 18.89 ±                   | 16.92 ± 0.81  |
|               | 0.12 de                               | 0.51 d                              | 0.22 de | 0.08 cd                      | 0.02 cd                   | cde           |
| C12           | 19.33 ±                               | 11.70 ±                             | 80.20 ± | 6.96 ±                       | 18.55 ±                   | 16.00 ± 0.07  |
|               | 0.51 de                               | 0.10 ef                             | 0.07 de | 0.30 cd                      | 0.01 cd                   | e             |
| C13           | 19.60 ±                               | 11.49 ±                             | 80.52 ± | 7.16 ±                       | 19.26 ±                   | 16.64 ± 0.12  |
|               | 0.47 de                               | 0.24 f                              | 0.25 de | 0.29 cd                      | 0.01 c                    | cde           |
| C14           | 19.37 ±                               | 12.22 ±                             | 79.62 ± | 6.90 ±                       | 18.64 ±                   | 16.49 ± 0.28  |
|               | 0.10 de                               | 0.09 de                             | 0.82 e  | 0.08 cd                      | 0.01 cd                   | de            |
| C15           | 18.16 ±                               | 4.69 ± 0.21                         | 68.26 ± | 9.93 ±                       | 33.66 ±                   | 24.21 ± 0.22  |
|               | 0.30 f                                | j                                   | 0.10 h  | 0.08 b                       | 0.01 ab                   | b             |
| C16           | 16.87 ±                               | 4.38 ± 0.10                         | 68.24 ± | 11.62 ±                      | 36.20 ±                   | 9.62 ± 0.49 f |
|               | 0.56 g                                | j                                   | 0.13 h  | 0.59 a                       | 0.01 a                    |               |
| C17           | 19.50 ±                               | 9.34 ± 0.07                         | 83.39 ± | 5.03 ±                       | 18.72 ±                   | 24.23 ± 0.77  |
|               | 0.24 de                               | gh                                  | 0.29 b  | 0.38 e                       | 0.01 cd                   | b             |
| C18           | 19.96 ±                               | 9.22 ± 0.48                         | 81.31 ± | 6.83 ±                       | 17.35 ±                   | 16.86 ± 0.41  |
|               | 0.14 de                               | gh                                  | 0.93 cd | 0.09 cd                      | 0.01 cde                  | cde           |
| C19           | 20.00 ±                               | 8.36 ± 0.40                         | 80.23 ± | 6.70 ±                       | 19.48 ±                   | 16.47 ± 0.64  |
|               | 0.07 de                               | i                                   | 0.64 de | 023 d                        | 0.01 c                    | de            |
| C20           | 20.25 ±                               | 9.04 ± 0.36                         | 80.06 ± | 6.77 ±                       | 19.91 ±                   | 17.03 ± 0.72  |
|               | 0.36 d                                | ghi                                 | 0.30 e  | 013 d                        | 0.01 c                    | cde           |
| C21           | 17.55 ±                               | 4.70 ± 0.24                         | 80.25 ± | 10.06 ±                      | 33.11 ±                   | 23.37 ± 0.38  |
|               | 0.20 fg                               | j                                   | 0.05 de | 021 b                        | 0.03 ab                   | b             |
| C22           | 19.52 ±                               | 11.37 ±                             | 80.23 ± | 6.68 ±                       | 18.66 ±                   | 16.49 ± 0.34  |
|               | 0.26 de                               | 0.08 f                              | 0.08 de | 0.30 d                       | 0.02 cd                   | de            |
| C23           | 19.39 ±                               | 9.71 ± 0.21                         | 80.37 ± | 6.73 ±                       | 19.14 ±                   | 17.82 ± 0.64  |
|               | 0.56 de                               | g                                   | 0.49 de | 0.12 d                       | 0.02 cd                   | cd            |
| C24           | 19.17 ±                               | 12.59 ±                             | 79.64 ± | 6.70 ±                       | 19.12 ±                   | 16.54 ± 0.27  |
|               | 0.07 e                                | 0.18 d                              | 0.34 e  | 0.12 d                       | 0.02 cd                   |               |

|     |                    |                  |                   |                   |                   |                   |
|-----|--------------------|------------------|-------------------|-------------------|-------------------|-------------------|
| C25 | 17.58 ±<br>0.21 fg | 4.55 ± 0.11<br>j | 71.92 ±<br>0.07 f | 9.48 ±<br>0.37 b  | 31.02 ±<br>0.01 b | 24.73 ± 0.91<br>b |
| C26 | 17.05 ±<br>0.27 g  | 4.51 ± 0.51<br>j | 69.43 ±<br>0.34 g | 10.16 ±<br>0.12 b | 31.01 ±<br>0.02 b | 23.58 ± 0.17<br>b |

a–j stands for significant difference.

**Table S4.** Sequencing data for 12 libraries were obtained by RNA sequencing.

|    | Varieties | Total<br>Reads | Clean<br>Reads | Clean<br>Bases | Q30    | GC     | Uniquely<br>Mapped |
|----|-----------|----------------|----------------|----------------|--------|--------|--------------------|
| CK | S16 1     | 47,115,326     | 47.12 M        | 7.06 G         | 97.20% | 48.09% | 88.67%             |
|    | S16 2     | 46,773,396     | 46.77 M        | 7.00 G         | 96.85% | 47.88% | 88.80%             |
|    | S16 3     | 46,879,404     | 46.88 M        | 7.02 G         | 96.91% | 48.04% | 88.48%             |
| HS | S16 1     | 46,844,078     | 46.84 M        | 7.01 G         | 97.38% | 47.30% | 87.70%             |
|    | S16 2     | 47,108,390     | 47.11 M        | 7.05 G         | 97.11% | 47.17% | 87.97%             |
|    | S16 3     | 47,158,500     | 47.16 M        | 7.06 G         | 96.92% | 47.12% | 87.63%             |
| CK | J7 1      | 47,104,308     | 47.10 M        | 7.05 G         | 97.25% | 48.12% | 87.95%             |
|    | J7 2      | 46,910,192     | 46.91 M        | 7.03 G         | 97.23% | 48.32% | 88.35%             |
|    | J7 3      | 46,644,998     | 46.64 M        | 6.97 G         | 97.35% | 48.68% | 87.95%             |
| HS | J7 1      | 46,503,960     | 46.50 M        | 6.96 G         | 97.20% | 47.20% | 87.81%             |
|    | J7 2      | 46,069,312     | 46.07 M        | 6.90 G         | 97.21% | 46.97% | 87.48%             |
|    | J7 3      | 46,768,592     | 46.77 M        | 7.00 G         | 97.23% | 47.53% | 87.92%             |

CK and HS represent treatments at 25/18 °C and 43 °C. Q20 and Q30 are the percentage of bases with a Clean Data quality value greater than 20 and 30 as a percentage of the total bases, respectively. GC (%) is the percentage of G and C bases in the total bases in Clean Data. Uniquely mapped is the number of reads aligned to the unique position of the reference genome and its percentage. It should be noted that 1, 2, and 3 represent the three biological repeats from each sample per treatment.

**Table S5.** List of differentially expressed genes associated with interested pathways under heat stress.

| Gene ID                | Annotation | Fold Change       |                  |                 |                  |
|------------------------|------------|-------------------|------------------|-----------------|------------------|
|                        |            | S16-HS-vs.-S16-CK | J7-HS-vs.-S16-HS | J7-HS-vs.-J7-CK | J7-CK-vs.-S16-CK |
| Sulfur metabolism      |            |                   |                  |                 |                  |
| LOC103860404           | APK1       | −0.63             | 1.9              | 3.72            | −2.46            |
| LOC103853800           | APK2       | −4.38             | 4.86             | 2.68            | −2.2             |
| LOC103868958           | APS1       | −0.22             | 0.54             | 2.13            | −1.82            |
| LOC103847275           | SIR        | −0.84             | 0.93             | 0.43            | −0.35            |
| Ribsom                 |            |                   |                  |                 |                  |
| LOC103849898           | RPS9C      | 6.4               | −0.17            | 8.54            | −2.33            |
| LOC103870906           | RPS7       | 1.73              | 1.21             | 3.79            | −0.85            |
| LOC103830735           | ARP2       | 1.58              | 0.84             | 3.7             | −1.29            |
| LOC103832205           | RPS13      | 1.72              | −0.04            | 3.65            | −2               |
| Glutathione metabolism |            |                   |                  |                 |                  |
| LOC103866350           | GSTF8      | 7.46              | 0.04             | 8.51            | 1.07             |
| LOC103852912           | GSTU10     | 4.01              | 1.52             | 6.73            | 1.2              |
| LOC103872505           | GSTU25     | 2.73              | −0.58            | 4.73            | −2.57            |
| LOC103858271           | GSTU5      | 4.57              | 0.26             | 5.33            | 1.03             |

**Table S6.** Genes and primers for qRT-PCR analysis.

| Gene Name | Primer Name | Primer Sequence (5'→3')     |
|-----------|-------------|-----------------------------|
| APK1      | primer F    | GGAAACTCGACGAACATA          |
|           | primer R    | AGACCAGTGACCCAAATC          |
| SIR       | primer F    | TAACCGAAGCTCCCAACGTCAA      |
|           | primer R    | AACTCATCTGCTAAGTCGTCCAT     |
| GSTU25    | primer F    | GACTCCTCAGCAGATTCAA         |
|           | primer R    | CCGCCTTCATCATCATCA          |
| GSTU5     | primer F    | CATCCTCGAGTACATCGACGAGACATG |
|           | primer R    | CTGAGCTTCCAGAGGCGTGTCT      |
| HSP70-1   | primer F    | TACTCTGCTCTCACGCGT          |
|           | primer R    | CTTGCCTTCAAACCTCGTC         |
| HSP90-5   | primer F    | GTTAGCATGATTGGGCAGTT        |
|           | primer R    | TCCTTCCTCGTCCTTCTTCT        |
| Actin     | primer F    | CGAGCTGCGTGTGGCACCTG        |
|           | primer R    | CATTGCTGGGCAGTTGAAGG        |

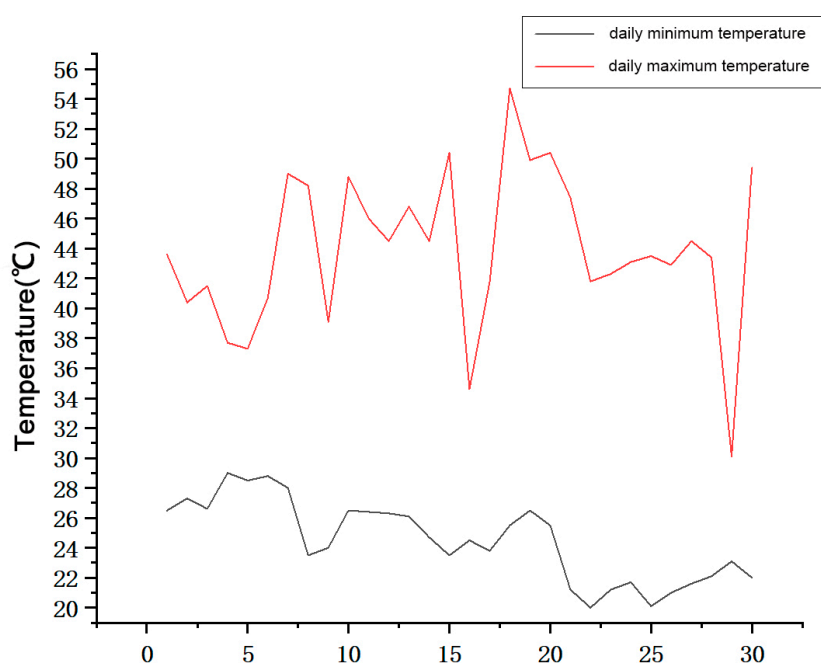

**Figure S1.** Daily maximum and minimum temperatures change within 30 days of the greenhouse.

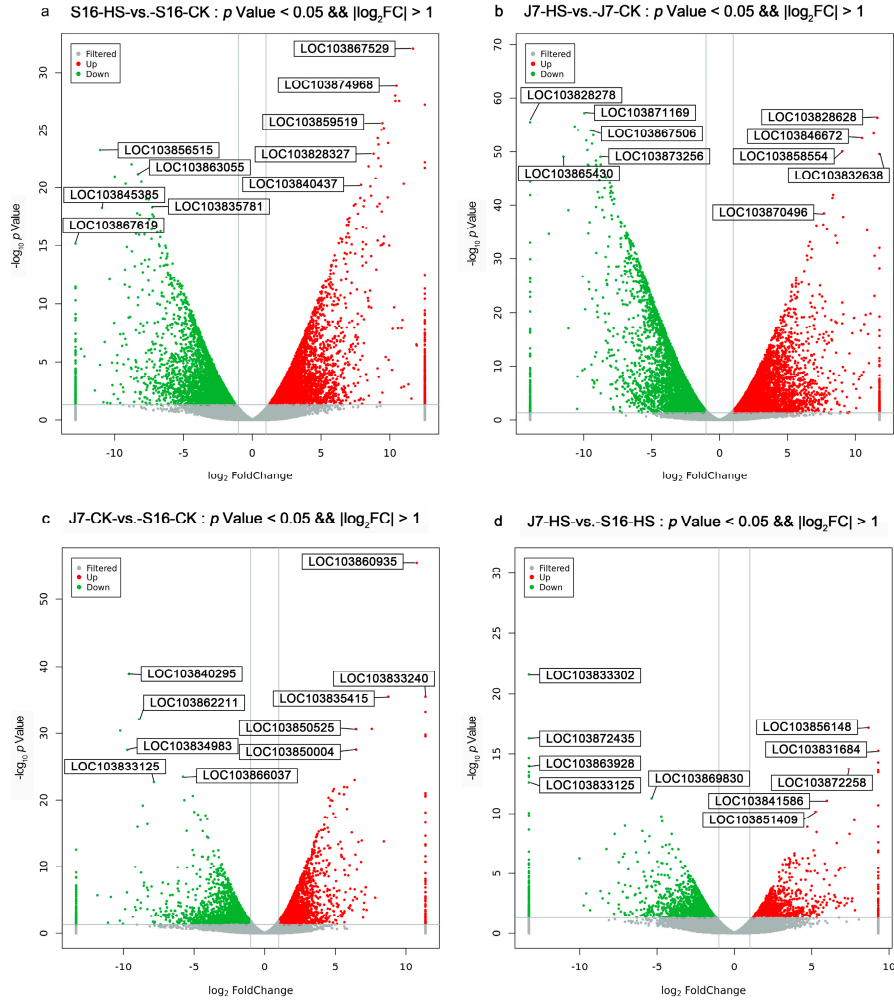

**Figure S2.** Volcano plots for expressed genes in the four comparison groups. Volcano plots for all the expressed genes in (a) S16-HS-vs-S16-CK; (b) J7-HS-vs-J7-CK; (c) J7-CK-vs-S16-CK; (d) J7-HS-vs-S16-HS. The X- and Y-axes present the  $\log_2$  (FC) for the two samples and  $-\log_{10}$  ( $p$ -value), respectively. Red (upregulated) and green (downregulated) dots indicate that the genes have significant differences, while the gray dots correspond to genes with no significant differences. Each volcano plot was tagged with 10 gene names.

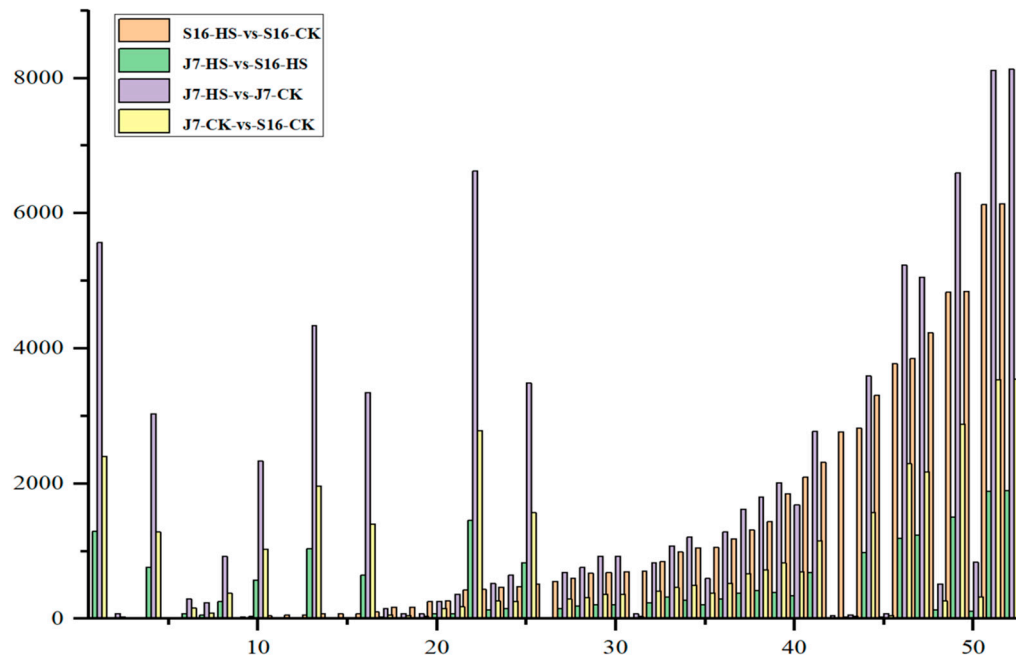

**Figure S3.** GO enrichment diagram. The Y-axis indicates the number of transcripts, and the X-axis indicates the GO classification. 1: channel regulator activity, 2: protein tag, 3: biological adhesion, 4: biological regulation, 5: cell killing, 6: translation regulator activity, 7: metallochaperone activity, 8: nutrient reservoir activity, 9: locomotion, 10: nucleoid, 11: protein binding transcription factor activity, 12: extracellular region part, 13: electron carrier activity, 14: molecular transducer activity, 15: receptor activity, 16: antioxidant activity, 17: rhythmic process, 18: enzyme regulator activity, 19: structural molecule activity, 20: immune system process, 21: growth, 22: symplast, 23: cell junction, 24: negative regulation of biological process, 25: membrane-enclosed lumen, 26: extracellular region, 27: transporter activity, 28: positive regulation of biological process, 29: reproductive process, 30: reproduction, 31: nucleic acid binding transcription factor activity, 32: multi-organism process, 33: signaling, 34: establishment of localization, 35: macromolecular complex, 36: localization, 37: multicellular organismal process, 38: developmental process, 39: cellular component organization or biogenesis, 40: membrane part, 41: regulation of biological process, 42: organelle part, 43: membrane, 44: response to stimulus, 45: catalytic activity, 46: metabolic process, 47: single-organism process, 48: binding, 49: cellular process, 50: organelle, 51: cell part, 52: cell.

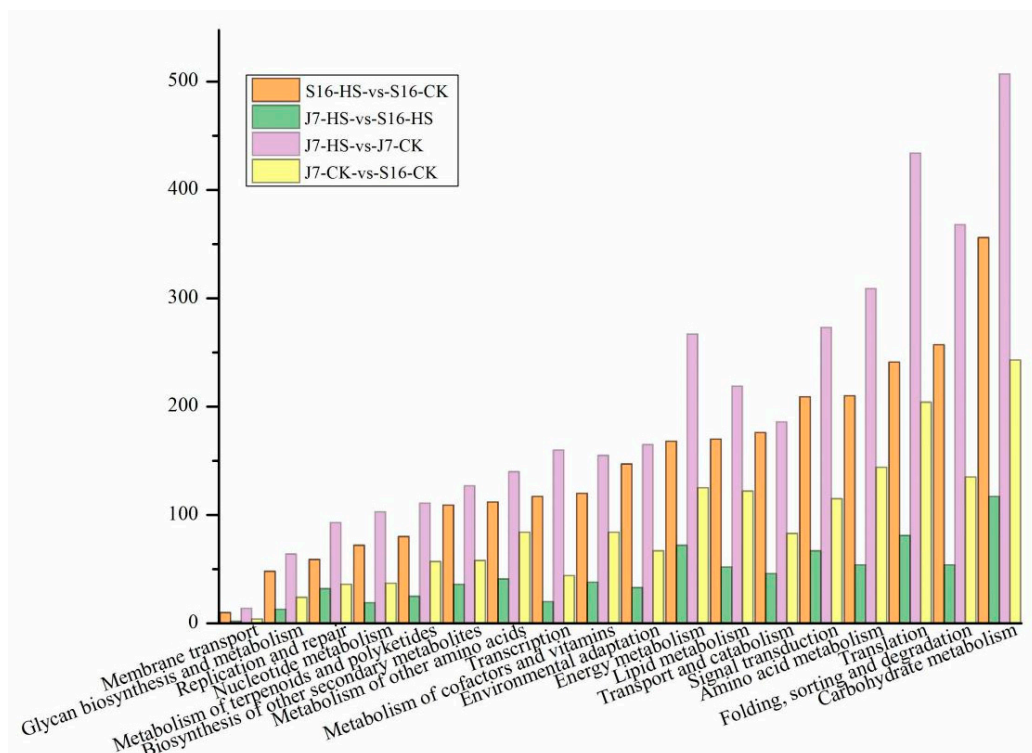

**Figure S4.** KEGG enrichment diagram.
